# Supplementary material for: Sonochemical Synthesis of Sulfur Doped Reduced Graphene Oxide Supported CuS Nanoparticles for the Non-Enzymatic Glucose Sensor Applications
Source: PubMed Central journal article supplement (PMC5449390; doi:10.1038/s41598-017-02479-5), 2017-05-30
Supplement: 41598_2017_2479_MOESM1_ESM.pdf [file 41598_2017_2479_MOESM1_ESM.pdf]

## Supporting information

### **Sonochemical synthesis of sulfur doped reduced graphene oxide supported CuS nanoparticles for the non-enzymatic glucose sensor applications**

**Natarajan Karikalan<sup>a</sup>, Raj Karthik<sup>a</sup>, Shen-Ming Chen<sup>\*a</sup>, Chelladurai Karuppiah<sup>a,b</sup> and Arumugam Elangovan<sup>c</sup>**

<sup>a</sup>Electroanalysis and Bioelectrochemistry Lab, Department of Chemical Engineering and Biotechnology, National Taipei University of Technology, No.1, Section 3, Chung-Hsiao East Road, Taipei 106, Taiwan (R.O.C).

<sup>b</sup>Department of Chemistry, National Taiwan University, No. 1, Section 4, Roosevelt Road, Taipei 106, Taiwan, ROC.

<sup>c</sup>Department of Chemistry, Thiagarajar college, Madurai, Tamilnadu 625009, India.

\*Corresponding author. Tel: +886 2270 17147, fax: +886 2270 25238.

E-mail address: [smchen78@ms15.hinet.net](mailto:smchen78@ms15.hinet.net) (SM Chen)

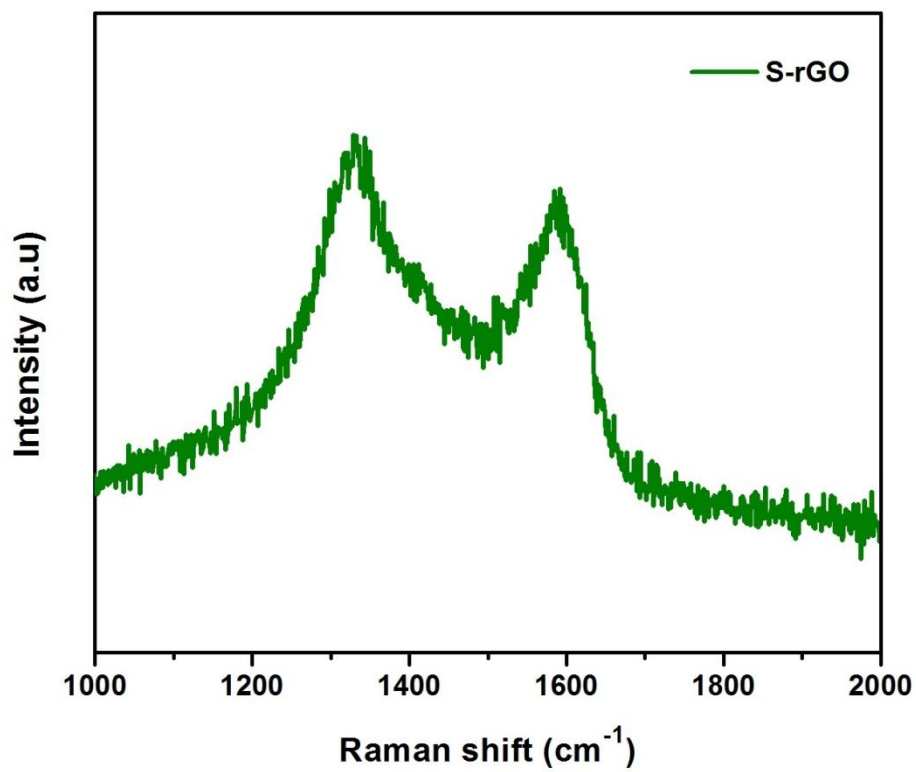

**Fig S1.** Raman spectrum of S-rGO

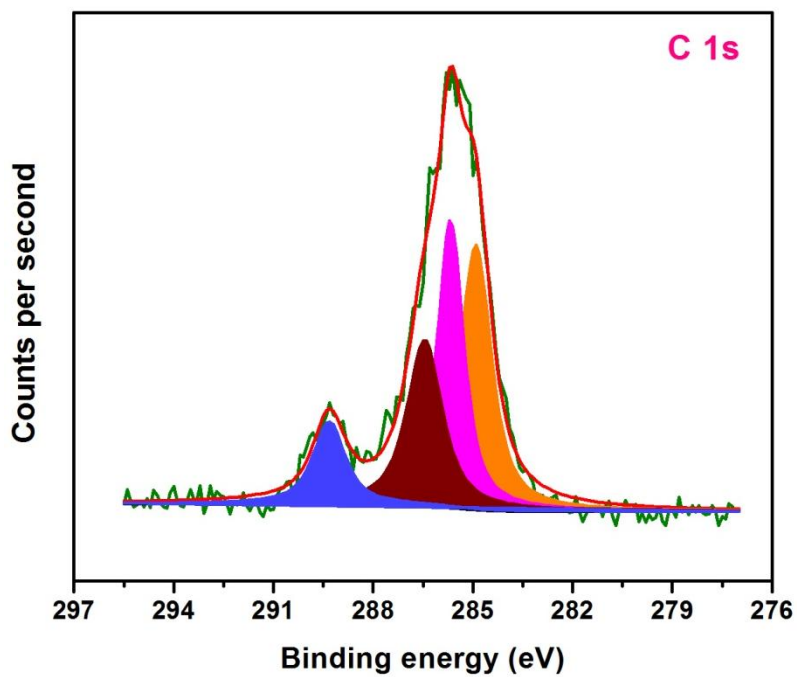

**Fig S2.** High resolution C 1s XPS spectrum of S-rGO

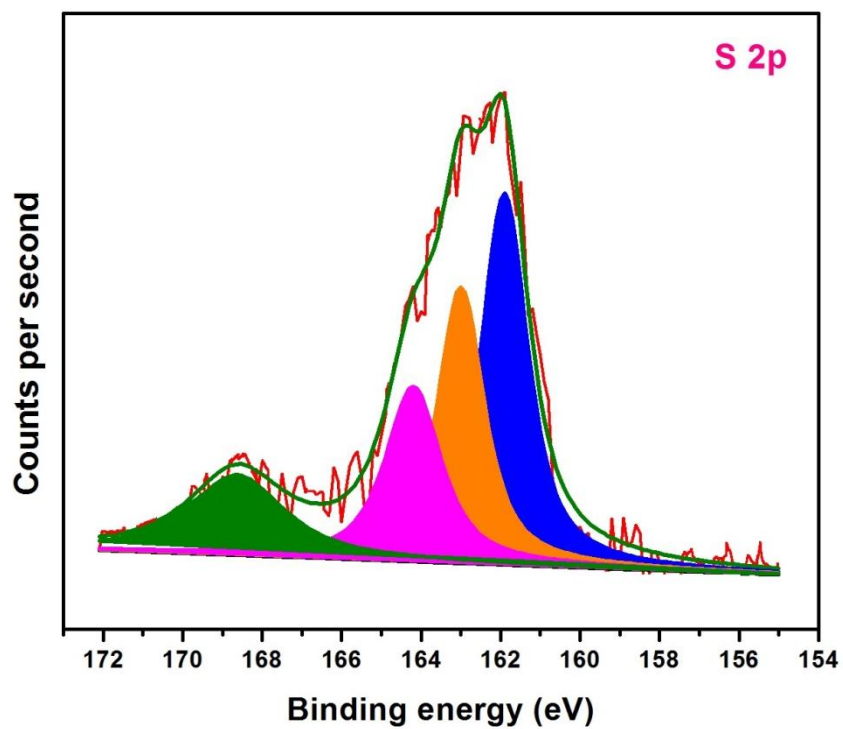

**Fig S3.** High resolution S 2p XPS spectrum of S-rGO

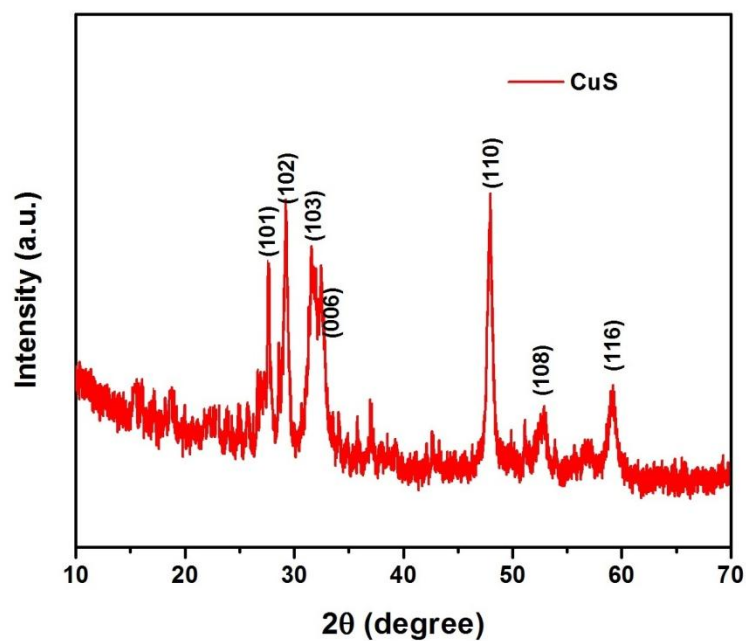

**Fig S4.** XRD patterns of bulk CuS

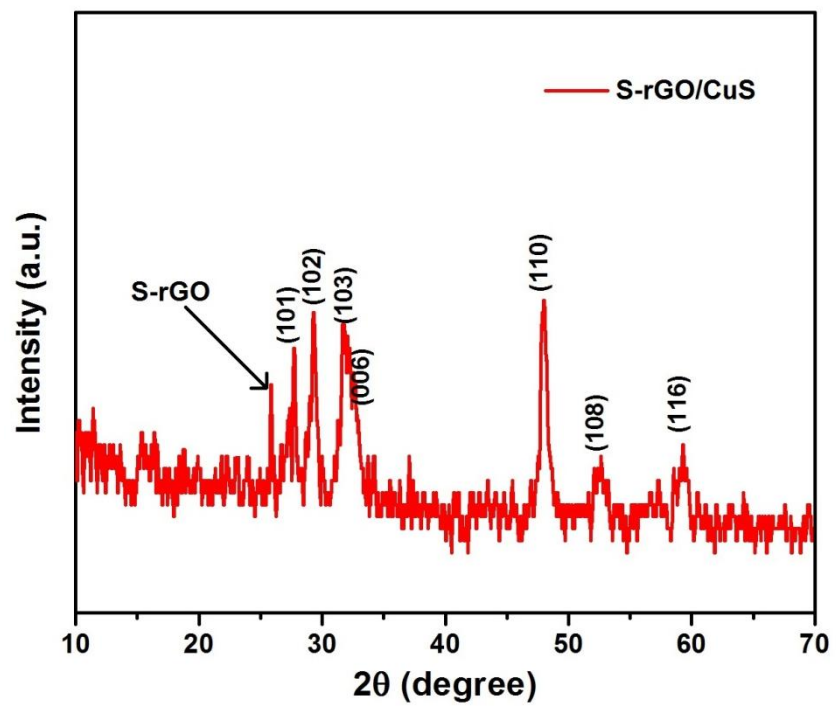

**Fig S5.** XRD patterns of S-rGO/CuS
